# Supplementary material for: Caffeic acid supplementation ameliorates intestinal injury by modulating intestinal microbiota in LPS-challenged piglets
Source: Royal Society of Chemistry journal article supplement (doi:10.1039/d3fo02286b), 2023-01-01
Supplement: d3fo02286b3.pdf [file d3fo02286b3.pdf]

**Table S1.** Composition and nutrient levels of the basal diet (air-dry-basis)

| <b>Ingredients</b>          | <b>%</b> |
|-----------------------------|----------|
| Suckling corn               | 28.98    |
| Expanded corn               | 15.00    |
| Broken rice                 | 15.00    |
| Expanded soybean            | 13.00    |
| Dried whey                  | 8.00     |
| Soybean meal 46%            | 4.50     |
| Glucose                     | 4.00     |
| Fish meal                   | 3.00     |
| Hydrolyzed Wheat Protein    | 3.00     |
| Soybean oil                 | 1.50     |
| Calcium Formate             | 0.80     |
| Montmorillonite             | 0.50     |
| Calcium phosphate monobasic | 0.50     |
| Lysine                      | 0.65     |
| Thr                         | 0.24     |
| Met                         | 0.16     |
| Trp                         | 0.07     |
| Antioxidant                 | 0.10     |
| Premix*                     | 1.00     |
| Nutrient levels             |          |
| NE, Mcal/kg                 | 2.62     |
| Crude protein               | 17.39    |
| Calcium                     | 0.69     |
| Phosphorus                  | 0.54     |
| Lysine                      | 1.23     |
| Methionine                  | 0.57     |
| Threonine                   | 0.90     |
| Cystine                     | 0.26     |

\*The premix provides per kg of diets: vitamin A: 18 000 IU; vitamin D<sub>3</sub>: 4 500 IU; vitamin E: 22.5 mg; vitamin K<sub>3</sub>: 4.5 mg; vitamin B<sub>1</sub>: 4.32 mg; vitamin B<sub>2</sub>: 12 mg; vitamin B<sub>6</sub>: 4.86 mg; vitamin B<sub>12</sub>: 30 µg; Biotin: 480 µg; Folic acid: 1.764 mg; Calcium Pantothenate: 33.12 mg; Nicotinamide: 41.58 mg; Cu: 20 mg; Fe: 140 mg; Zn: 140 mg; Mn: 40 mg; Se: 0.3 mg; I: 0.5 mg.

**Table S2.** Primers for qRT-PCR analysis

| <b>Genes</b>                    | <b>Accession No.</b> | <b>Primer sequences</b>                               |
|---------------------------------|----------------------|-------------------------------------------------------|
| <i>Occludin</i>                 | NM_001163647.2       | F: CAGGTGCACCCTCCAGATTG<br>R: TATGTCGTTGCTGGGTGCAT    |
| <i>Claudin-1</i>                | NM_001243483.1       | F: TTCCTCAATACAGGAGGGAAGC<br>R: CCCTCTCCCCACATTCGAG   |
| <i>ZO-1</i>                     | XM_003480423.4       | F: CTCCAGGCCCTTACCTTTTCG<br>R: GGGGTAGGGGTCCTTCCTAT   |
| <i>IL-1<math>\beta</math></i>   | NM_001302388.1       | F: AGGGACCCTACCCTCTC<br>R: CTTCTCCACTGCCACGATGA       |
| <i>IL-6</i>                     | NM_214399.1          | F: TGAGGCAAAGGGAAAGA<br>R: GCGCAGGATGAGAATGA          |
| <i>IL-10</i>                    | NM_214041.1          | F: TCGGCCAGTGAAGAGTTTC<br>R: GGAGTTCACGTGCTCCTTGA     |
| <i>TNF-<math>\alpha</math></i>  | NM_214022.1          | F: TAAGGGCTGCCTTGGTTCAG<br>R: AGAGGTTACGCGATGTAGCG    |
| <i>TLR4</i>                     | NM_001113039.2       | F: AAGGTTATTGTCGTGGTGT<br>R: CTGCTGAGAAGGCGATAC       |
| <i>NF-<math>\kappa</math>B</i>  | NM_001114281.1       | F: AGTACCCTGAGGCTATAACTCGC<br>R: TCCGCAATGGAGGAGAAGTC |
| <i>HO-1</i>                     | NM_001004027.1       | F: GTTTGAGGAGGTGCAGGAG<br>R: GGTTGTCACGGGAGTGG        |
| <i>NQO1</i>                     | NM_001159613.1       | F: CAGCATTGGGCACACTC<br>R: GGCGCAAAGTACAGTGG          |
| <i>SOD1</i>                     | NM_001190422.1       | F: GCCAAAGGATCAAGAGAGG<br>R: GAGAGGGCGATCACAGAA       |
| <i>CAT</i>                      | NM_214301.2          | F: GCTGAGTCCGAAGTCGTCTA<br>R: GTCAGGATATCAGGTTTCTGCG  |
| <i>GPX1</i>                     | NM_214201.1          | F: AACGGTGCGGGACTACA<br>R: TCGGACGTACTIONTGAGGCA      |
| <i>GPX2</i>                     | NM_001115136.1       | F: CAACACATTCCGAGGCA<br>R: GAAGCCAAGAACCACCAG         |
| <i>Bax</i>                      | XM_013998624.2       | F: GACGCTGGACTTCCTTCGAG<br>R: GTGGCCCGAGAGAGGTTTATT   |
| <i>Bcl-2</i>                    | XM_021099593.1       | F: GCTACTTACTGCCAAAGGGA<br>R: TTCAGGCGGAGCTGTAAGAG    |
| <i>Fas</i>                      | XM_021072073.1       | F: TGATGCCCAAGTGACTGACC<br>R: GCAGAATTGACCCTCACGAT    |
| <i>Caspase3</i>                 | NM_214131.1          | F: GGAATGGCATGTTCGATCTGGT<br>R: ACTGTCCGTCTCAATCCCAC  |
| <i>Caspase9</i>                 | XM_003127618.4       | F: AATGCCGATTTGGCTTACGT<br>R: CATTGCTTGGCAGTCAGGTT    |
| <i><math>\beta</math>-actin</i> | XM_001928093.1       | F: GCGTAGCATTGCTGCATGA<br>R: GCGTGTGTGTAAGTGGGGT      |
| <i>GAPDH</i>                    | NM_001206359.1       | F: CGTGTCGGTTGTGGATCTGA<br>R: TGACGAAGTGGTCGTTGAGG    |
